# Supplementary material
Source: Royal Society of Chemistry journal article supplement (doi:10.1039/d6sm00176a)
Supplement: d6sm00176a1.pdf [file d6sm00176a1.pdf]

## Structure–Rheology–Thermal Property Correlation in Graphene Oxide Reinforced Gum Acacia-g-Poly(acrylic acid) Nanocomposite Hydrogels

| Material (grade)                                                   | IUPAC Name                                  | Suppliers             | Molecular Weight           |
|--------------------------------------------------------------------|---------------------------------------------|-----------------------|----------------------------|
| Gum acacia                                                         | -                                           | HI-MEDIA Pvt. Ltd.    | 250 kDa                    |
| Acrylic acid (Stabilised) 98%                                      | 2-propenoic acid                            | Loba Chemie Pvt. Ltd. | 72.06 g mol <sup>-1</sup>  |
| (NH <sub>4</sub> ) <sub>2</sub> S <sub>2</sub> O <sub>8</sub> (AR) | Ammonium persulfate                         | HI-MEDIA Pvt. Ltd.    | 228.19 g mol <sup>-1</sup> |
| N,N'-methylene bis-acrylamide                                      | N-[(prop-2-enoylamino)methyl]prop-2-enamide | Loba Chemie Pvt. Ltd. | 154.17 g mol <sup>-1</sup> |
| Graphene Oxide                                                     | -                                           | Sigma-Aldrich         | -                          |

**Table S1.** Material specifications that are utilised

| Sample Name | Gum acacia (mg) | TDW (mL) | MBA (mg) | APS (mg) | Acrylic acid (AA) (mL) | Graphene Oxide (GO) (mg) |
|-------------|-----------------|----------|----------|----------|------------------------|--------------------------|
| GAPAA GO-0  | 500             | 7        | 50       | 50       | 0.25                   | 0                        |
| GAPAA GO-1  | 500             | 7        | 50       | 50       | 0.25                   | 1                        |
| GAPAA GO-2  | 500             | 7        | 50       | 50       | 0.25                   | 2                        |

|            |     |   |    |    |      |   |
|------------|-----|---|----|----|------|---|
| GAPAA GO-3 | 500 | 7 | 50 | 50 | 0.25 | 3 |
| GAPAA GO-4 | 500 | 7 | 50 | 50 | 0.25 | 4 |
| GAPAA GO-5 | 500 | 7 | 50 | 50 | 0.25 | 5 |

**Table S2.** Feed composition for the synthesis of Gum acacia-*grafted*-poly(Acrylic acid)/Graphene oxide nanocomposite hydrogel

**Table S3.** Summary of Power Law parameters (flow behaviour index n, consistency index k) along with corresponding R<sup>2</sup> values describing the rheological behaviour of the materials

| Sample Name | n                 | k                   | R <sup>2</sup> |
|-------------|-------------------|---------------------|----------------|
| GAPAA GO-0  | 0.22407 ± 0.08232 | 97.20753 ± 32.92612 | 0.8713         |
| GAPAA GO-1  | 0.14432 ± 0.00747 | 48.9192 ± 1.52323   | 0.99901        |
| GAPAA GO-2  | 0.27026 ± 0.01273 | 80.5988 ± 4.18711   | 0.99587        |
| GAPAA GO-3  | 0.17723 ± 0.01869 | 99.09318 ± 7.67956  | 0.99332        |
| GAPAA GO-4  | 0.21893 ± 0.01348 | 42.24235 ± 2.34444  | 0.99607        |
| GAPAA GO-5  | 0.22896 ± 0.01359 | 59.08217 ± 3.30028  | 0.99588        |

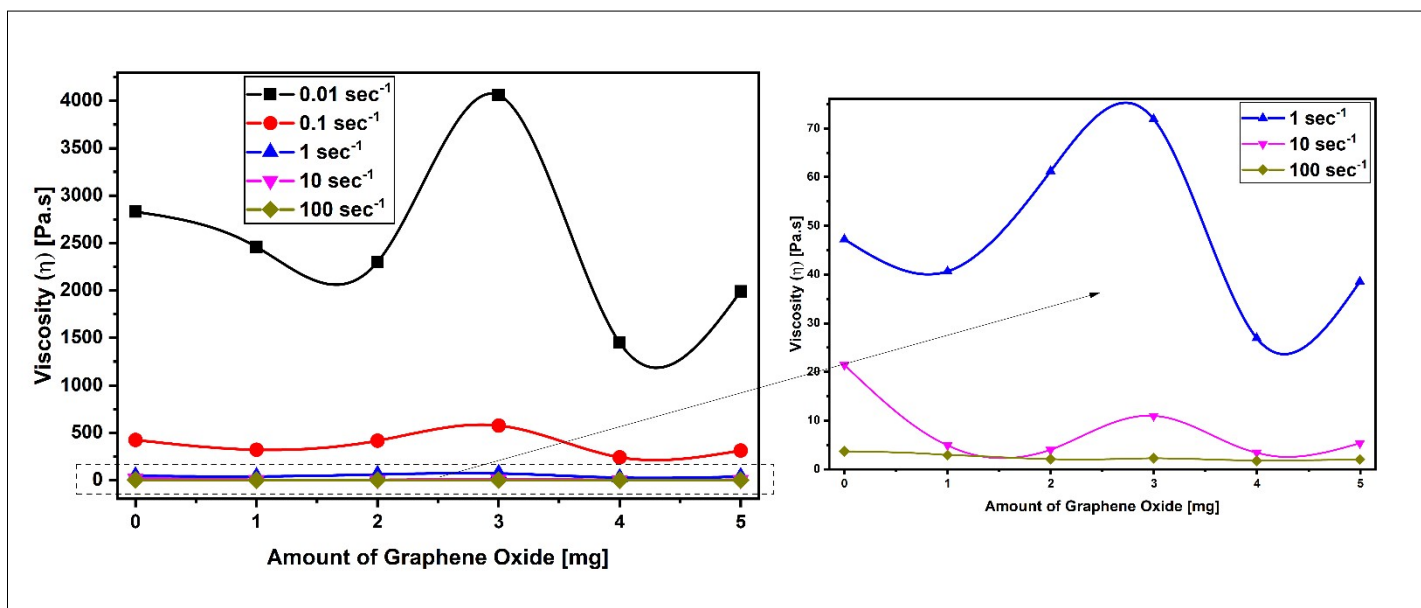

**Figure S1** Effect of the amount of GO on viscosity at various shear rates ( $\text{sec}^{-1}$ )

**Table S4.** Values of viscosity at 0.01, 0.1, 1, 10, and 100  $\text{sec}^{-1}$  shear rates for different amounts of the GO nanofillers loaded in Gum acacia-g-poly(Acrylic acid) hydrogel

| Graphene Oxide (mg) | Shear rate ( $\text{sec}^{-1}$ ) |                  |                  |                  |                  |
|---------------------|----------------------------------|------------------|------------------|------------------|------------------|
|                     | 0.01                             | 0.1              | 1                | 10               | 100              |
|                     | Viscosity (Pa·s)                 | Viscosity (Pa·s) | Viscosity (Pa·s) | Viscosity (Pa·s) | Viscosity (Pa·s) |
| 0                   | 2830                             | 426              | 47.2             | 21.4             | 3.62             |
| 1                   | 2460                             | 322              | 40.6             | 4.88             | 2.84             |
| 2                   | 2300                             | 417              | 61.2             | 3.94             | 2.04             |
| 3                   | 4060                             | 577              | 71.9             | 10.9             | 2.22             |
| 4                   | 1450                             | 243              | 26.9             | 3.38             | 1.67             |
| 5                   | 1990                             | 314              | 38.5             | 5.3              | 1.94             |

**Table S5.** Herschel - Bulkley Model parameters: Yield stress ( $\tau_0$ ), Consistency coefficient (k), flow index (n), and Goodness-of-fit ( $R^2$ ) values for the tested samples

| Sample Name | $\tau_0$               | k                       | n                     | $R^2$   |
|-------------|------------------------|-------------------------|-----------------------|---------|
| GAPAA GO-0  | $28.3 \pm 10.35727$    | $40.17704 \pm 10.37011$ | $0.49298 \pm 0.05796$ | 0.91798 |
| GAPAA GO-1  | $33.99452 \pm 3.68495$ | $0.65285 \pm 0.39062$   | $1.32362 \pm 0.13545$ | 0.9105  |
| GAPAA GO-2  | $33.9764 \pm 4.55632$  | $16.71042 \pm 4.4136$   | $0.51687 \pm 0.05965$ | 0.91543 |
| GAPAA GO-3  | $57.87787 \pm 3.15904$ | $7.87412 \pm 2.35492$   | $0.66105 \pm 0.06865$ | 0.91977 |
| GAPAA GO-4  | $22.10618 \pm 2.36885$ | $1.53525 \pm 0.68433$   | $1.01721 \pm 0.10192$ | 0.91557 |
| GAPAA GO-5  | $25.69756 \pm 2.41926$ | $11.65737 \pm 2.05002$  | $0.59715 \pm 0.04019$ | 0.96657 |

**Table S6.** Summary of viscoelastic parameters: storage modulus, loss modulus, and damping

| Sample Name | 0.1 rad s <sup>-1</sup> |      |              | 1 rad s <sup>-1</sup> |      |              | 10 rad s <sup>-1</sup> |      |              | 100 rad s <sup>-1</sup> |     |              |
|-------------|-------------------------|------|--------------|-----------------------|------|--------------|------------------------|------|--------------|-------------------------|-----|--------------|
|             | G'                      | G''  | tan $\delta$ | G'                    | G''  | tan $\delta$ | G'                     | G''  | tan $\delta$ | G'                      | G'' | tan $\delta$ |
| GAPAA GO-0  | 59.2                    | 3.22 | 0.0543       | 61.2                  | 3.48 | 0.0569       | 62.5                   | 4.4  | 0.0703       | 0                       | 219 | -            |
| GAPAA GO-1  | 71.3                    | 5.2  | 0.0729       | 67.1                  | 5.69 | 0.0848       | 69.9                   | 7.24 | 0.104        | 0                       | 233 | -            |
| GAPAA GO-2  | 62.1                    | 4.39 | 0.0707       | 67.3                  | 5.82 | 0.0864       | 71.7                   | 8.91 | 0.124        | 0                       | 251 | -            |
| GAPAA GO-3  | 131                     | 8.15 | 0.062        | 116                   | 5.6  | 0.0482       | 119                    | 7.83 | 0.0658       | 0                       | 155 | -            |
| GAPAA GO-4  | 67.7                    | 5.23 | 0.0772       | 55                    | 3.31 | 0.0602       | 55                     | 4.59 | 0.0834       | 0                       | 258 | -            |
| GAPAA GO-5  | 35.9                    | 2.65 | 0.0736       | 33.9                  | 2.84 | 0.0838       | 32.7                   | 3.75 | 0.115        | 0                       | 283 | -            |

factor at 0.1, 1, 10, and 100 (rad s<sup>-1</sup>) angular frequencies

**Table S7.** Summary of complex viscosity measured at selected angular frequencies (0.1, 1, 10, and 100 rad s<sup>-1</sup>)

| Sample Name | Complex Viscosity ( $\eta^*$ ) |                       |                        |                         |
|-------------|--------------------------------|-----------------------|------------------------|-------------------------|
|             | 0.1 rad s <sup>-1</sup>        | 1 rad s <sup>-1</sup> | 10 rad s <sup>-1</sup> | 100 rad s <sup>-1</sup> |
| GAPAA GO-0  | 593                            | 61.3                  | 6.26                   | 2.19                    |
| GAPAA GO-1  | 715                            | 67.3                  | 7.02                   | 2.33                    |
| GAPAA GO-2  | 622                            | 67.6                  | 7.23                   | 2.51                    |
| GAPAA GO-3  | 1320                           | 116                   | 11.9                   | 1.55                    |
| GAPAA GO-4  | 679                            | 55.1                  | 5.52                   | 2.58                    |
| GAPAA GO-5  | 360                            | 34.1                  | 3.3                    | 2.83                    |

| Sample Name | 40.7°C |      |              |            | 62.7°C |      |              |            | 84.7°C |      |              |            |
|-------------|--------|------|--------------|------------|--------|------|--------------|------------|--------|------|--------------|------------|
|             | G'     | G''  | tan $\delta$ | $ \eta^* $ | G'     | G''  | tan $\delta$ | $ \eta^* $ | G'     | G''  | tan $\delta$ | $ \eta^* $ |
| GAPAA GO-0  | 70.4   | 3.79 | 0.0538       | 7.05       | 231    | 95.2 | 0.412        | 25         | 2140   | 1690 | 0.79         | 272        |
| GAPAA GO-1  | 49.2   | 4.31 | 0.0877       | 4.94       | 219    | 101  | 0.462        | 24.1       | 1960   | 1580 | 0.806        | 252        |
| GAPAA GO-2  | 112    | 7.25 | 0.0648       | 11.2       | 470    | 247  | 0.525        | 53.1       | 7160   | 5840 | 0.815        | 924        |
| GAPAA GO-3  | 122    | 7.7  | 0.0631       | 12.2       | 453    | 243  | 0.537        | 51.4       | 6990   | 4820 | 0.69         | 849        |
| GAPAA GO-4  | 83.8   | 6.05 | 0.0721       | 8.4        | 446    | 280  | 0.628        | 52.7       | 9710   | 6370 | 0.656        | 1160       |

**Table S8.** Storage modulus (G'), Loss modulus (G''), Damping factor (tan  $\delta$ ), and Complex viscosity ( $\eta^*$ ) values at the heating temperatures 40.7°C, 62.7°C, and 84.7°C

|            |    |      |        |      |     |     |       |     |      |      |       |     |
|------------|----|------|--------|------|-----|-----|-------|-----|------|------|-------|-----|
| GAPAA GO-5 | 83 | 5.69 | 0.0685 | 8.32 | 786 | 633 | 0.806 | 101 | 5680 | 4420 | 0.779 | 720 |
|------------|----|------|--------|------|-----|-----|-------|-----|------|------|-------|-----|

**Table S9.** Storage modulus ( $G'$ ), Loss modulus ( $G''$ ), Damping factor ( $\tan \delta$ ), and Shear Stress ( $\tau$ ) values at 0.1, 1, 10, and 99.8 % Strain

| Sample Name | 0.1% Strain |       |               |        | 1% Strain |       |               |        | 10% Strain |       |               |        | 99.8% Strain |       |               |        |
|-------------|-------------|-------|---------------|--------|-----------|-------|---------------|--------|------------|-------|---------------|--------|--------------|-------|---------------|--------|
|             | $G'$        | $G''$ | $\tan \delta$ | $\tau$ | $G'$      | $G''$ | $\tan \delta$ | $\tau$ | $G'$       | $G''$ | $\tan \delta$ | $\tau$ | $G'$         | $G''$ | $\tan \delta$ | $\tau$ |
| GAPAA GO-0  | 66.4        | 2.42  | 0.0364        | 0.0661 | 67.6      | 2.73  | 0.0404        | 0.675  | 64.2       | 4.33  | 0.0675        | 6.42   | 42.9         | 14    | 0.326         | 44.9   |
| GAPAA GO-1  | 74.4        | 4.54  | 0.061         | 0.0743 | 76.3      | 5.1   | 0.0668        | 0.763  | 72.6       | 6.46  | 0.089         | 7.27   | 41           | 16.4  | 0.399         | 44     |
| GAPAA GO-2  | 82.8        | 11.9  | 0.143         | 0.0833 | 82        | 8.68  | 0.106         | 0.823  | 75.6       | 9.58  | 0.127         | 7.6    | 48.8         | 17.1  | 0.35          | 51.5   |
| GAPAA GO-3  | 117         | 10.9  | 0.0937        | 0.117  | 120       | 8.17  | 0.068         | 1.2    | 114        | 10.2  | 0.0897        | 11.4   | 80.1         | 23.5  | 0.293         | 83.1   |
| GAPAA GO-4  | 52.2        | 8.19  | 0.157         | 0.0526 | 55.3      | 4.47  | 0.0808        | 0.552  | 55         | 4.82  | 0.0876        | 5.5    | 42.9         | 8.32  | 0.194         | 43.5   |
| GAPAA GO-5  | 29.9        | 4.75  | 0.159         | 0.0303 | 30.6      | 3.67  | 0.12          | 0.306  | 29.6       | 3.93  | 0.133         | 2.97   | 19.8         | 6.12  | 0.31          | 20.6   |
